# Supplementary material for: Rapid synthesis of Ce3+-doped YAG nanoparticles by a solvothermal method using metal carbonates as precursors
Source: Royal Society of Chemistry journal article supplement (doi:10.1039/c2nj40429j), 2012-01-01
Supplement: c2nj40429j.pdf [file c2nj40429j.pdf]

Supplementary information:

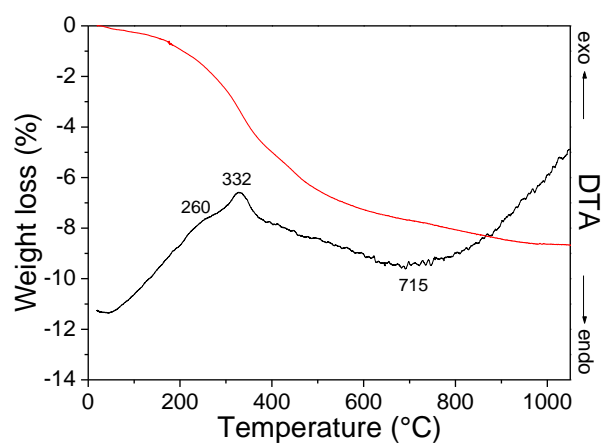

**Figure S1** : TG-DTA profiles of YAG:Ce<sup>3+</sup> NPs synthesized by 1 h heating at 300°C. TGA experience is performed under air with a heating rate of 5 °C / min.

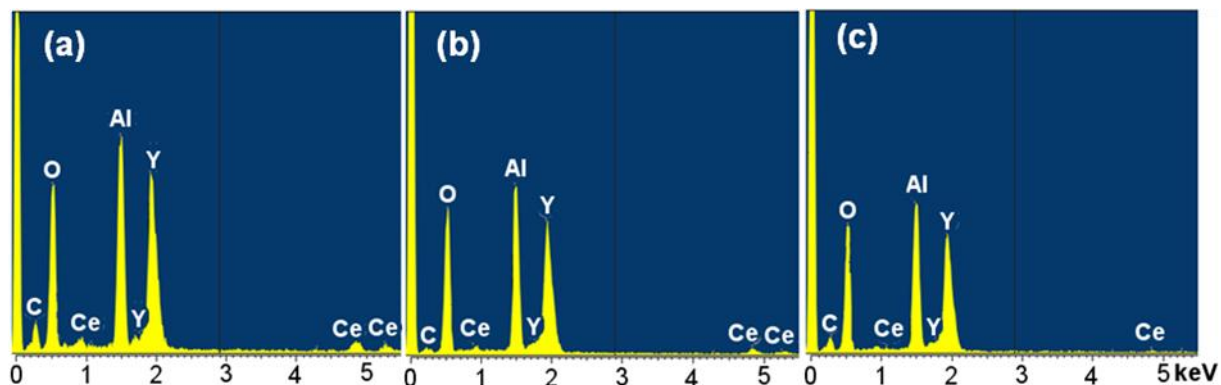

**Figure S2** : EDX spectra of YAG:Ce<sup>3+</sup> NPs at different doping concentrations (a) 6%, (b) 3% and (c) 1 mol % of Ce<sup>3+</sup>. Concentrations are given with  $\pm 20\%$  error.

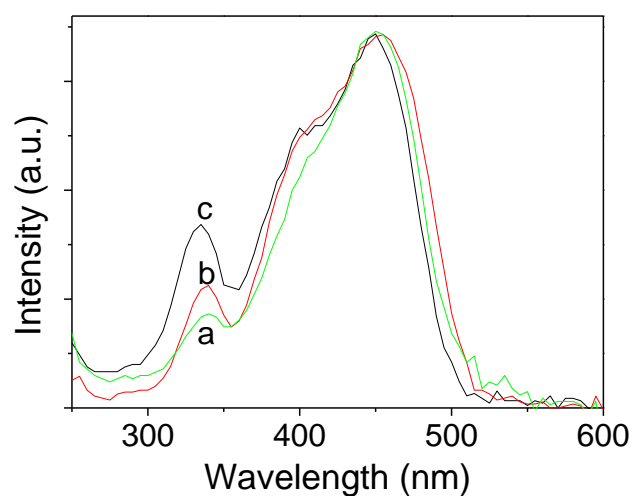

**Figure S3** : Room temperature excitation spectra of YAG:Ce<sup>3+</sup> NPs synthesized by heating at 300°C for (a) 5 min, (b) 1 h and (c) 12 h.
